# Supplementary material for: Cancer risk in individuals with intellectual disability in Sweden: A population-based cohort study
Source: PLOS journal article supplement (doi:10.1371/journal.pmed.1003840), 2021-10-21

**S3 Fig.** Cancer risk overall (any cancer) and by cancer type among individuals with ID and reference group

**A. Risk of any cancer.**

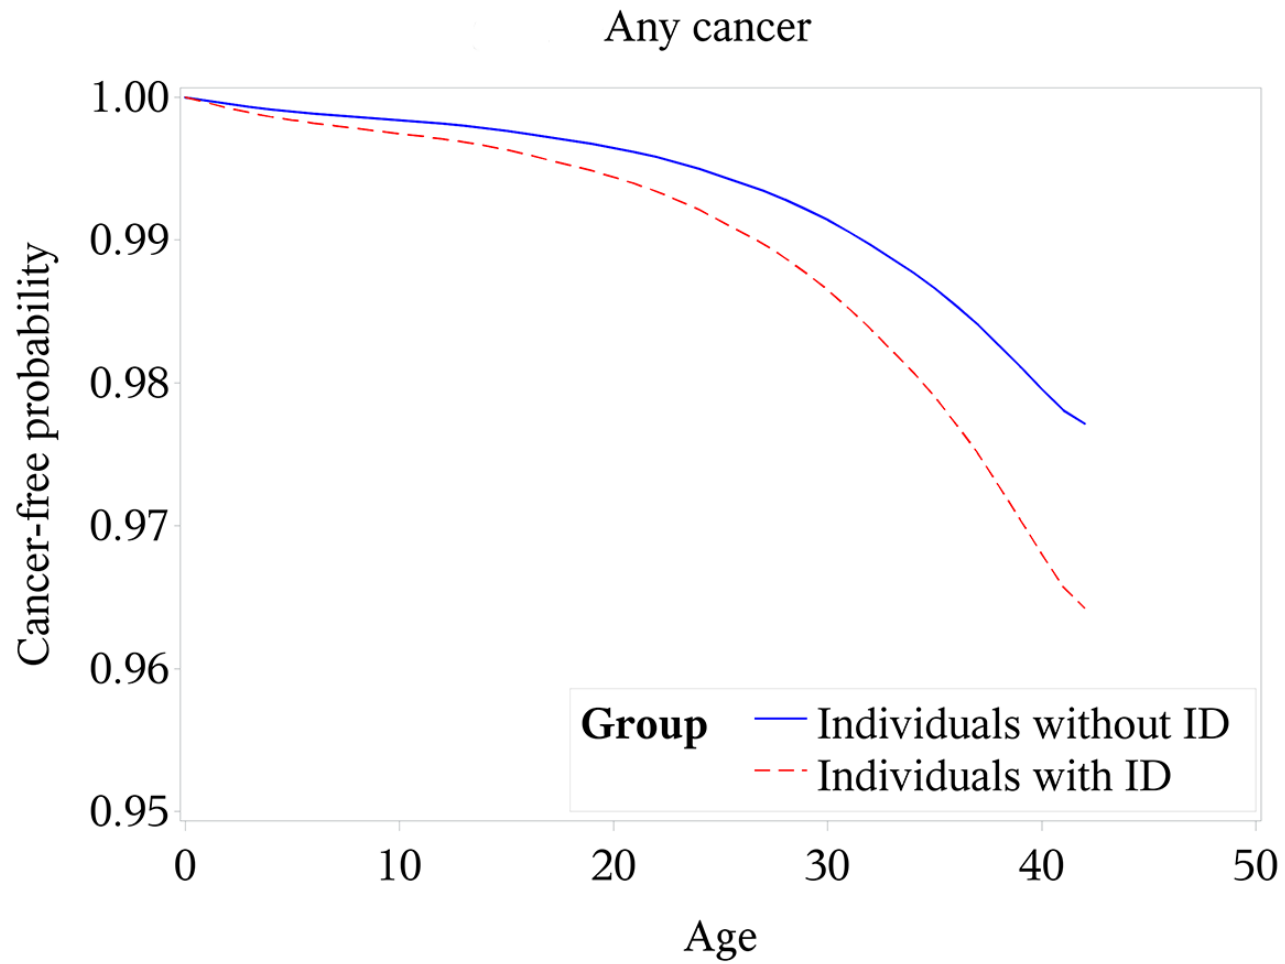

## B. Risk of cancer of salivary gland, esophagus, stomach and small intestine.

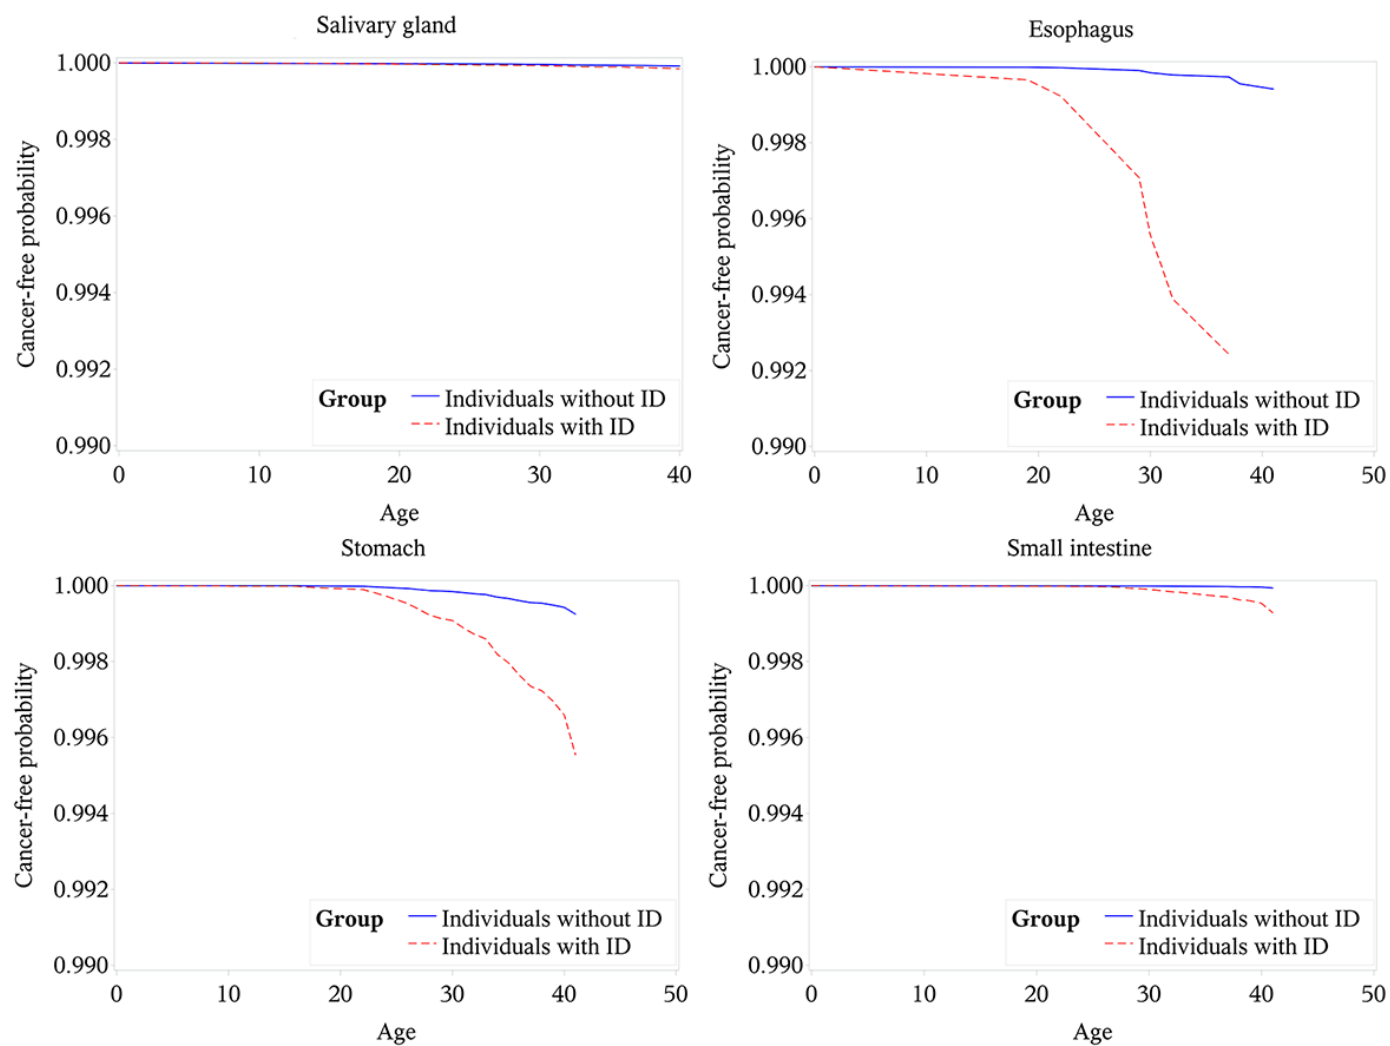

### C. Risk of cancer of colon, rectum, liver and pancreas

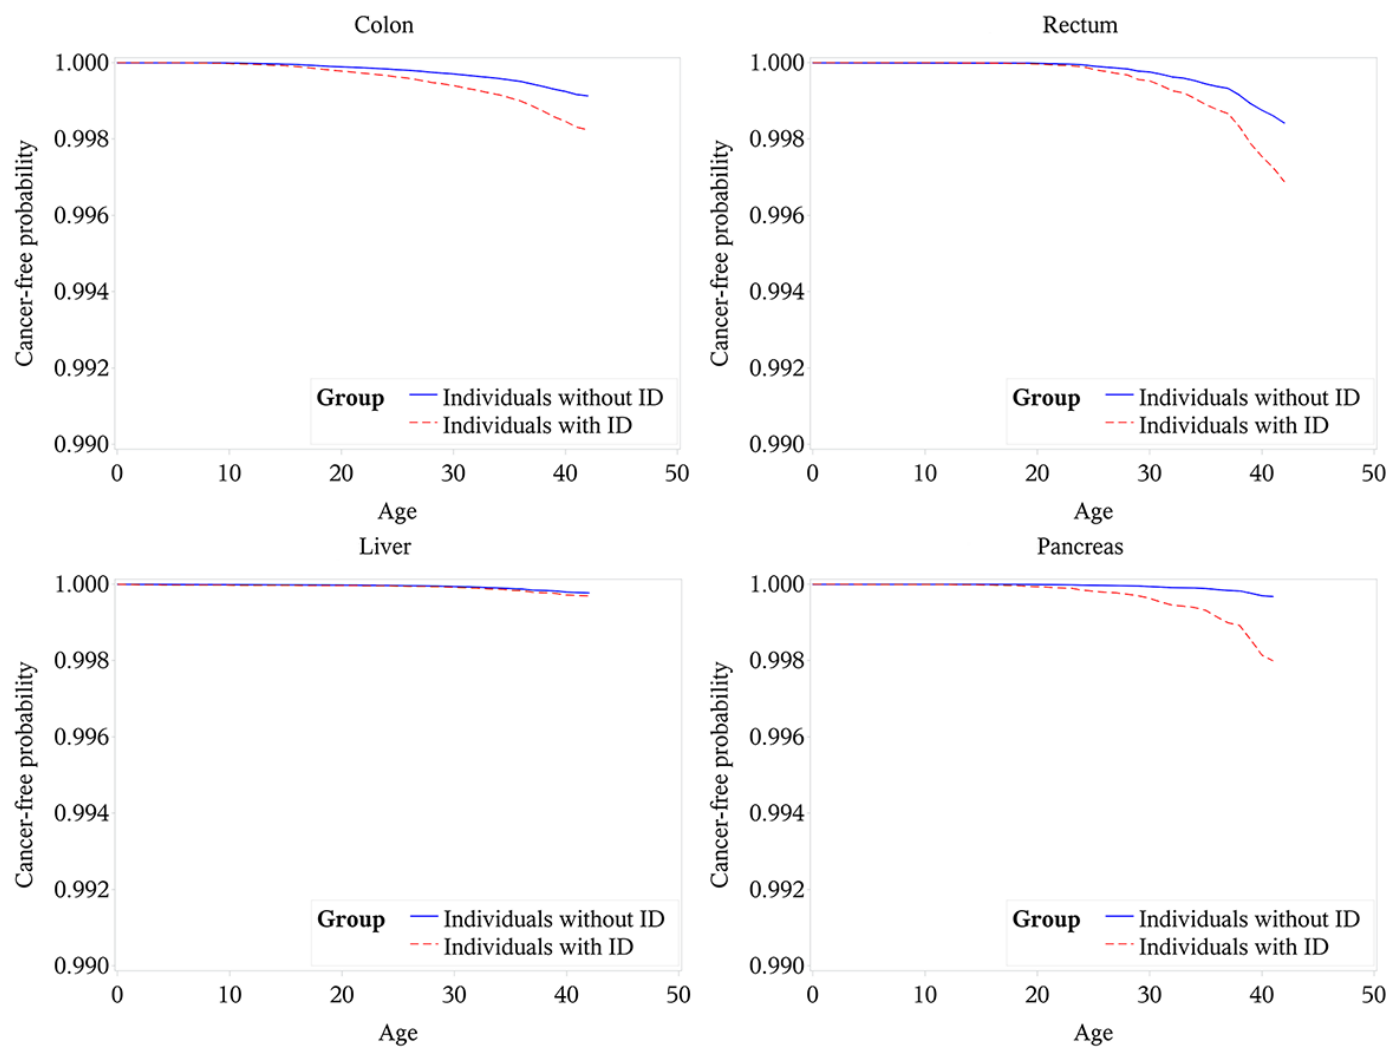

#### D. Risk of cancer of lung, breast, cervix and uterus

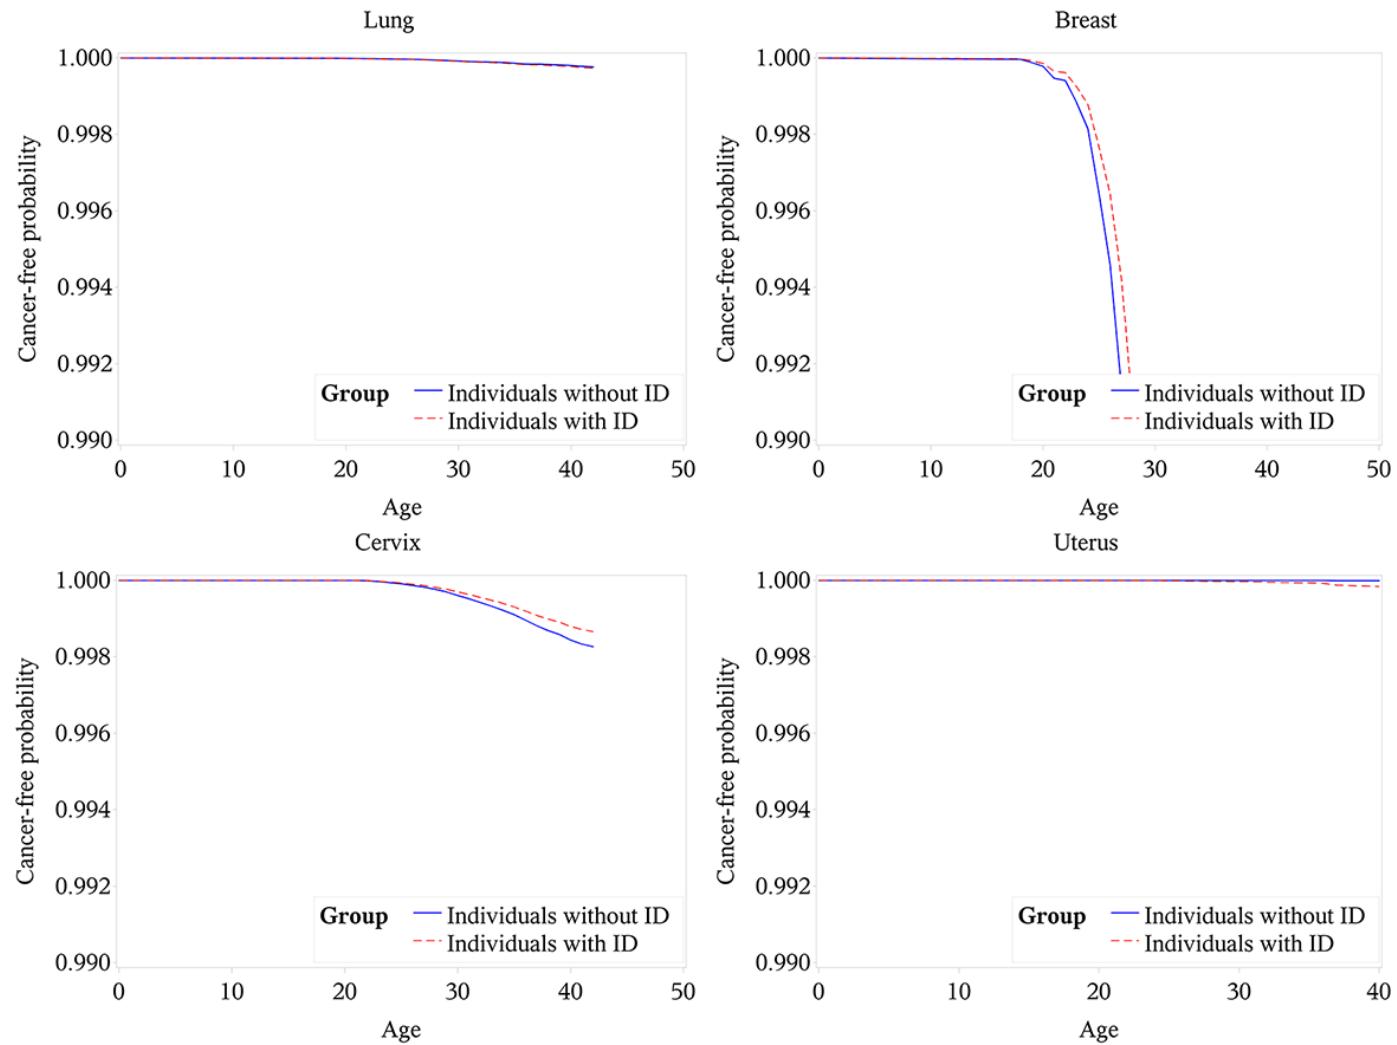

## E. Risk of cancer of ovary, testis, kidney and melanoma

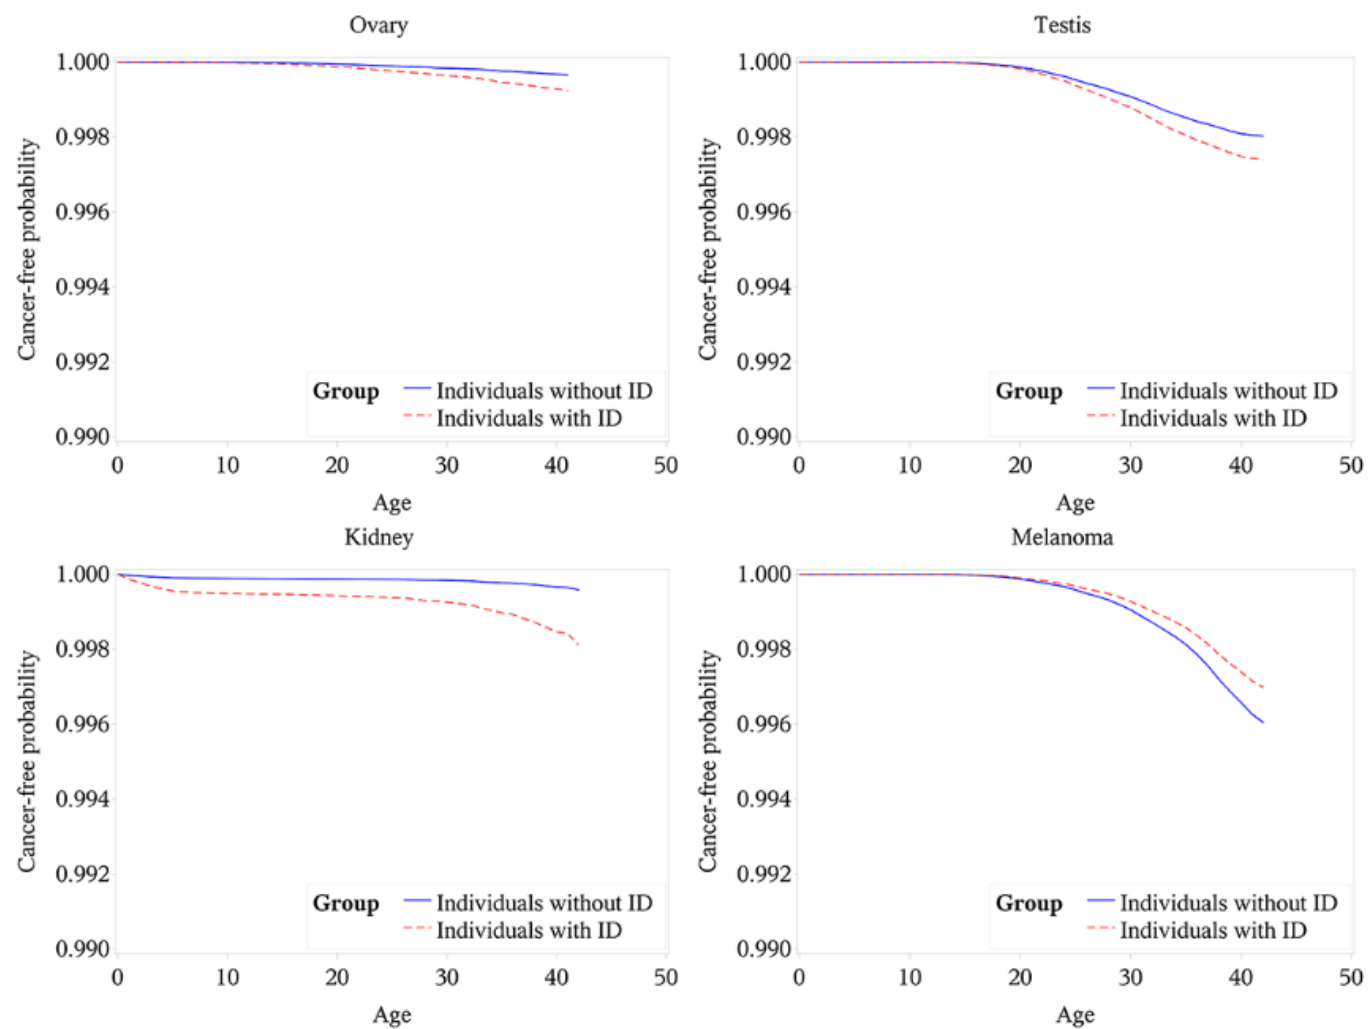

## F. Risk of cancer of non-melanoma skin, eye, CNS, and thyroid

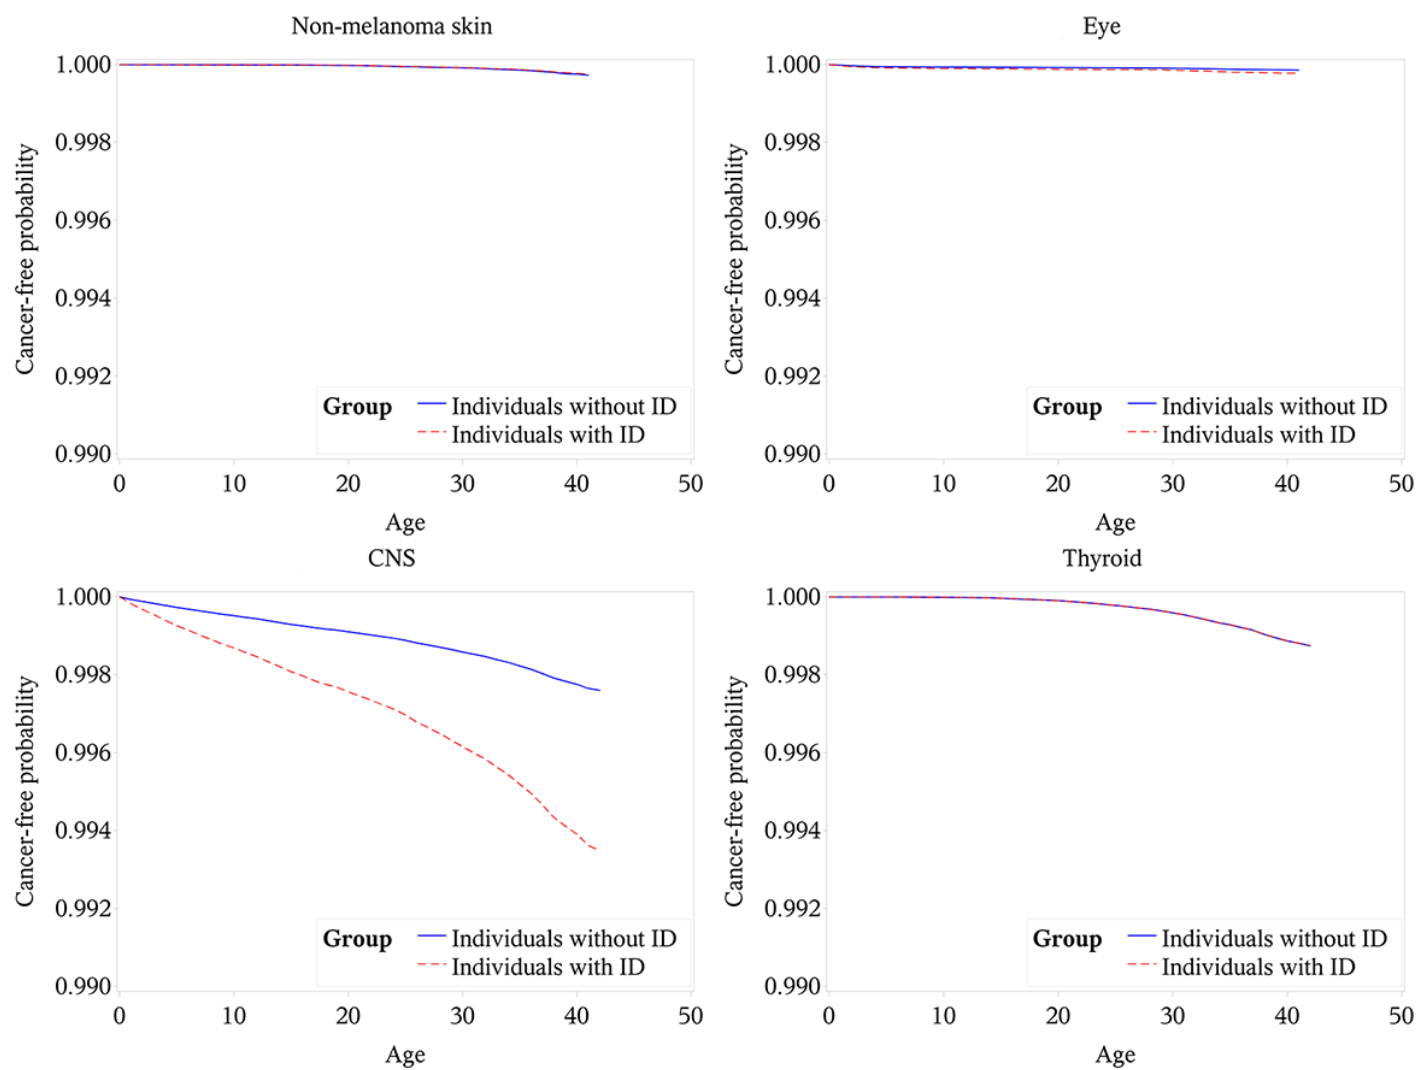

## G. Risk of cancer of other endocrine gland, bone, connective tissue and other or unspecified sites

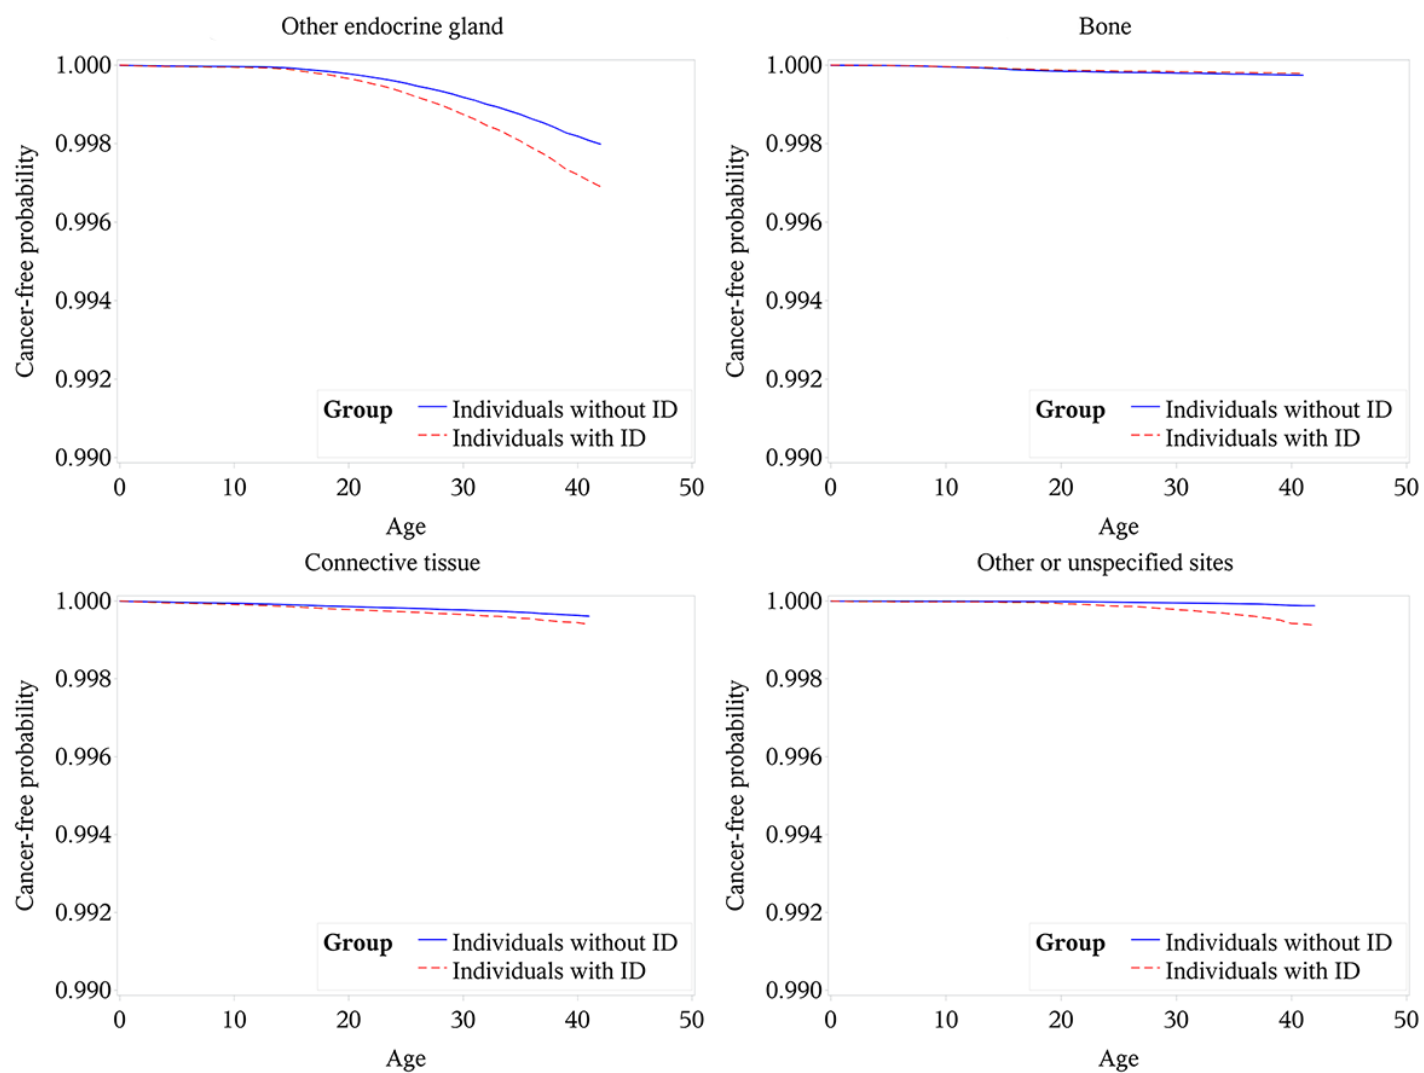

H. Risk of Hodgkin’s lymphoma, Non-Hodgkin’s lymphoma, ALL and AML

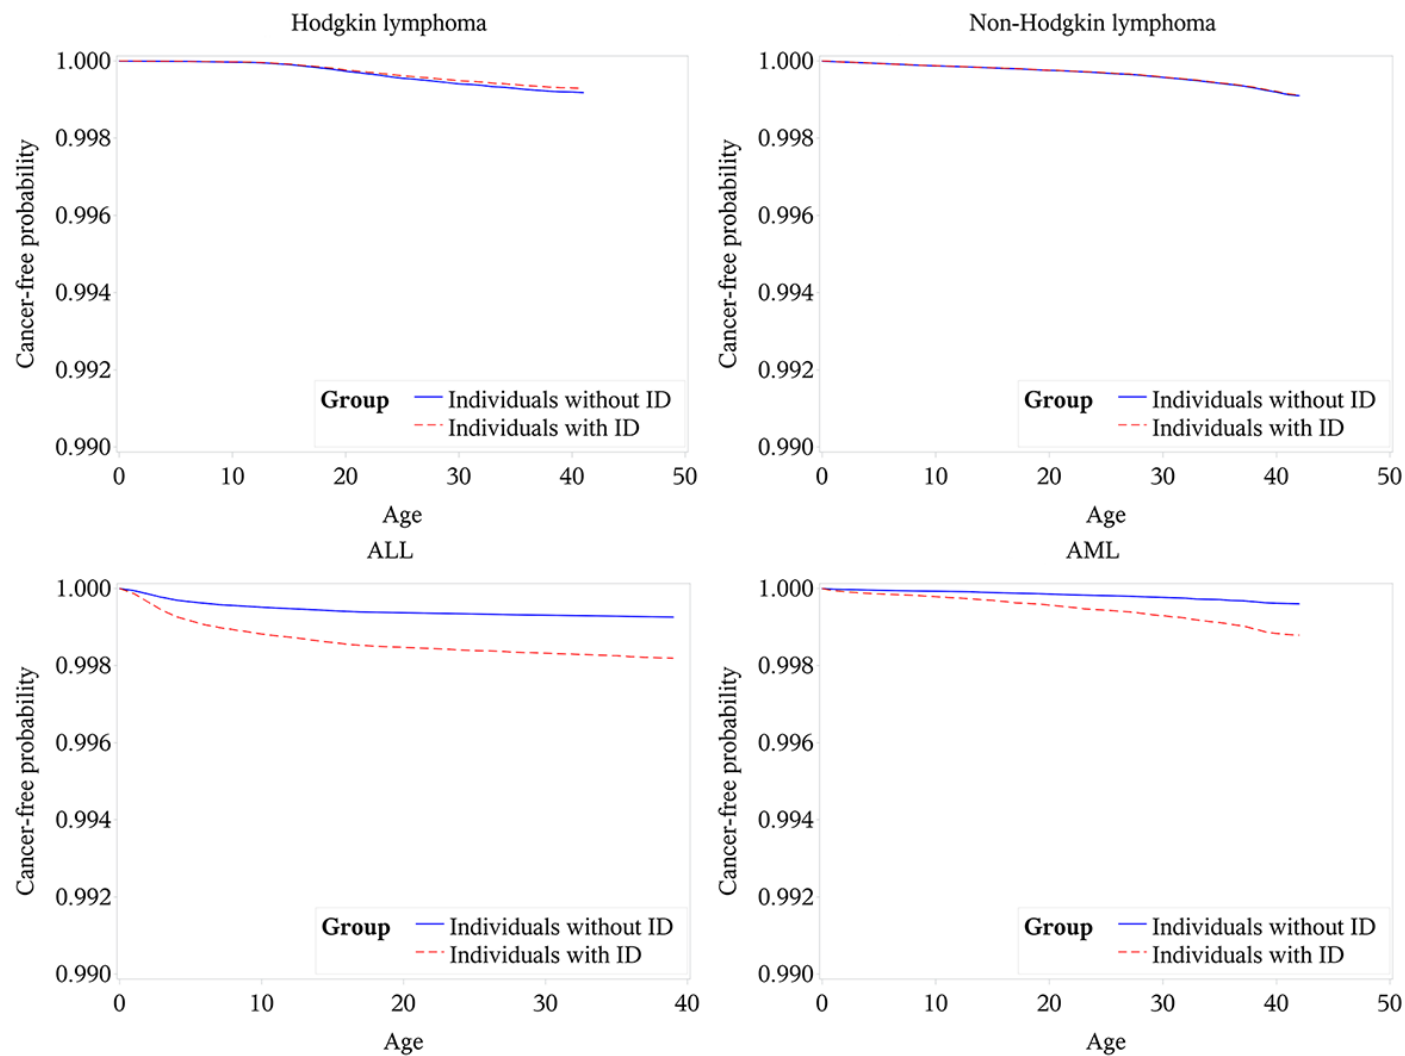

Supplement: S3 (10.1371/journal.pmed.1003840.s003) [file journal.pmed.1003840.s003]
